# Supplementary material for: Isocyanate-free urethanediol itaconates as biobased liquid monomers in photopolymerization-based 3D printing
Source: Springer Nature journal article supplement (doi:10.1007/s40964-024-00598-w), 2024-04-06
Supplement: MOESM1 [file 26953560]

# Isocyanate-free urethanediol itaconates as biobased liquid monomers in photopolymerization-based 3D printing

*R. Carmenini, C. Spanu, E. Locatelli, L. Sambri, M. Comes Franchini\* and M. Maturi\**

Department of Industrial Chemistry “Toso Montanari”, University of Bologna, Via P. Gobetti 85,  
40129 Bologna (Italy)

**SUPPORTING INFORMATION**

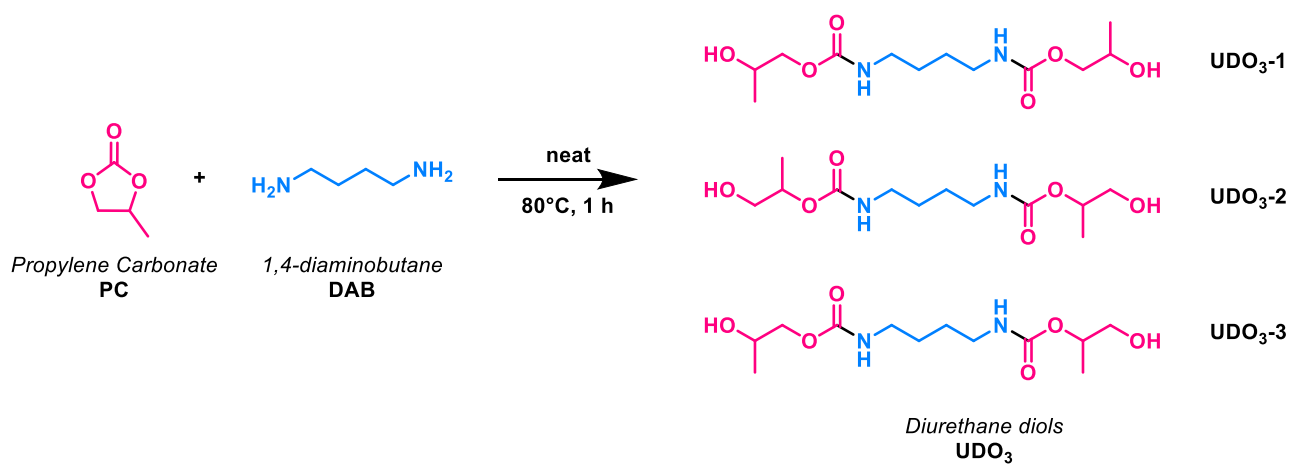

**Scheme S1.** Chemical structure of the different isomers of UDO<sub>3</sub> formed by aminolysis of propylene carbonate with 1,4-diaminobutane.

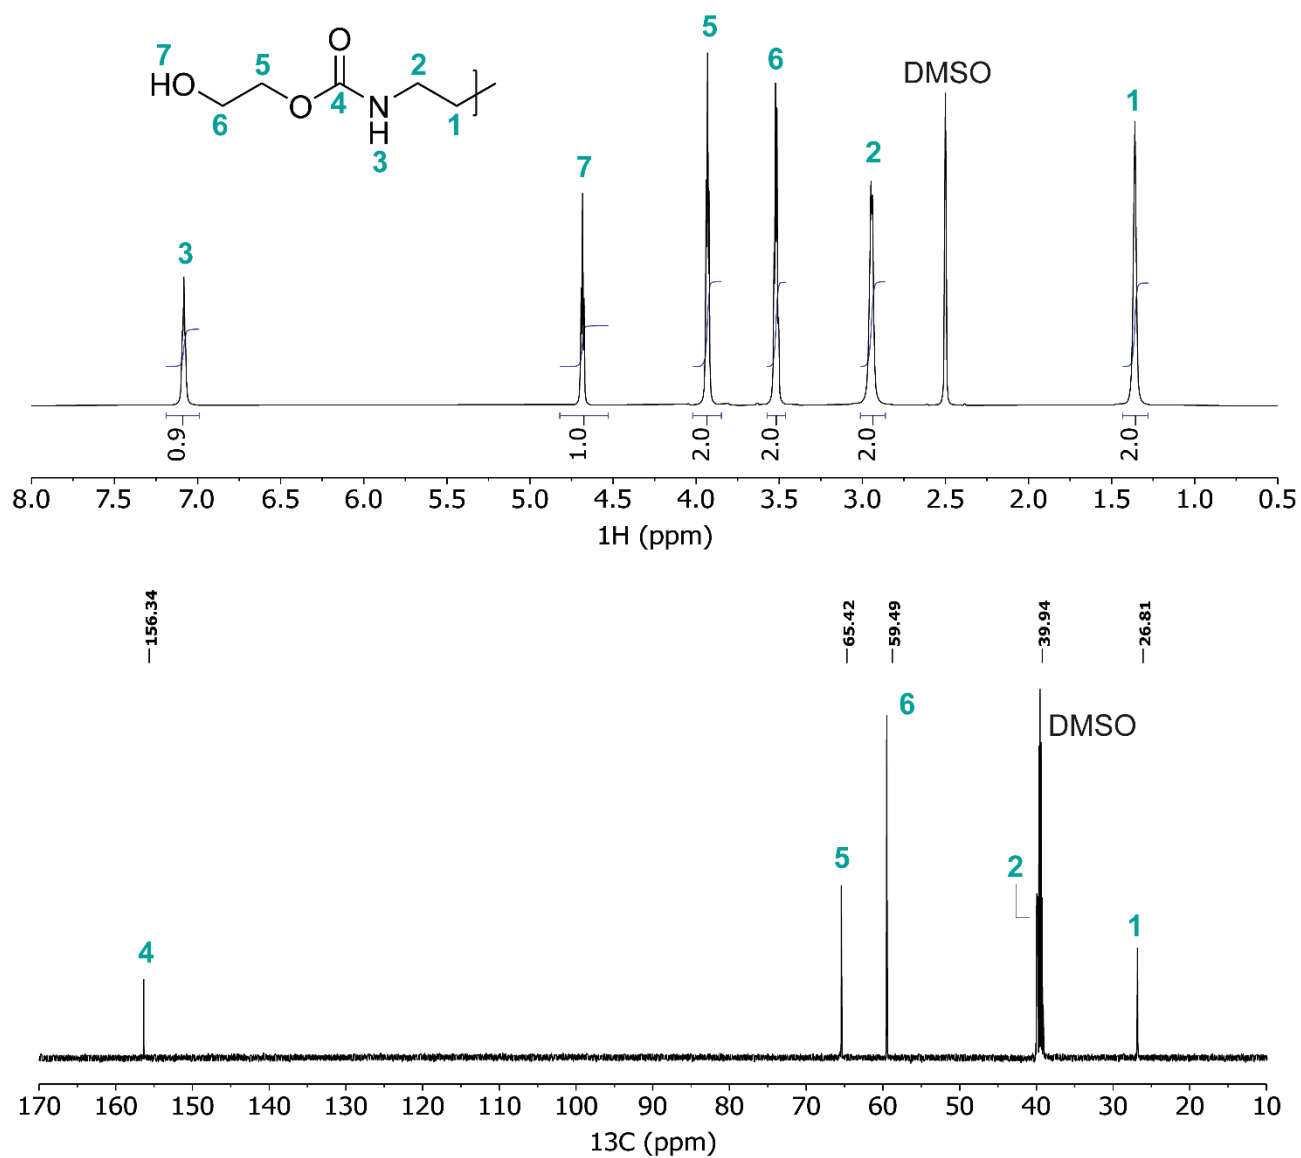

**Figure S1.** <sup>1</sup>H- (600 MHz, DMSO-*d*<sub>6</sub>, top) and <sup>13</sup>C- (150 MHz DMSO-*d*<sub>6</sub>, bottom) NMR spectra of UDO<sub>2</sub>. The signal corresponding to carbon 2 is partially overlapped with the septuplet of DMSO, but still distinguishable.

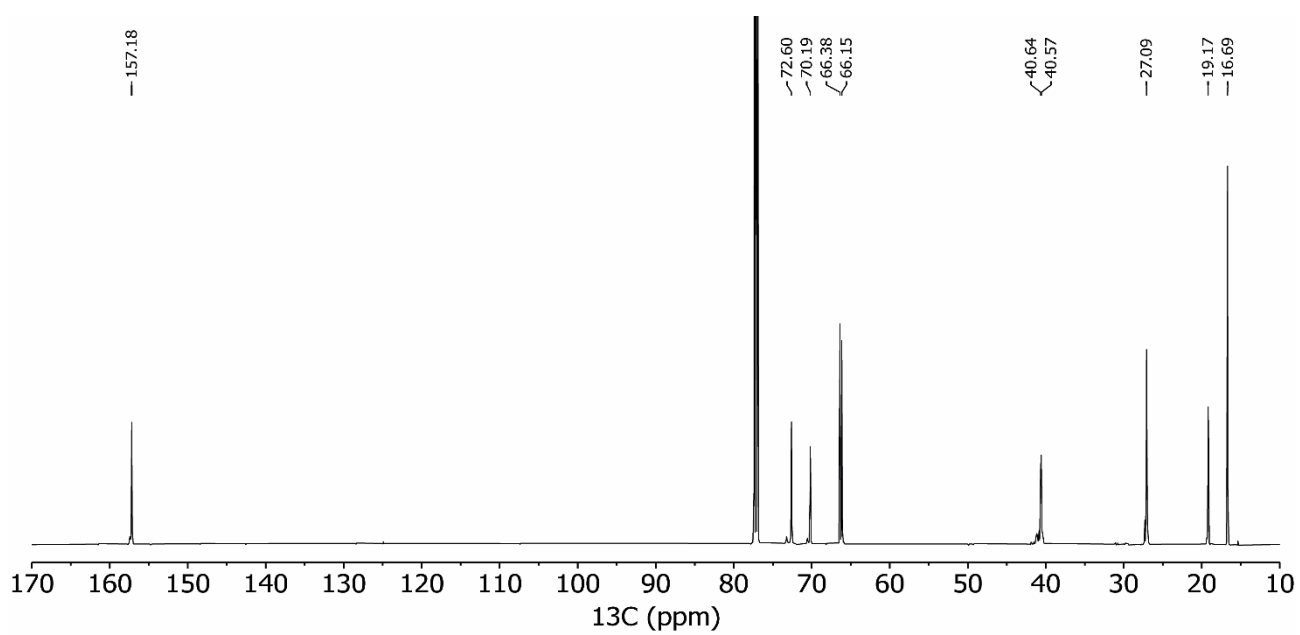

**Figure S2.** <sup>13</sup>C-NMR spectrum (150 MHz, CDCl<sub>3</sub>) of UDO<sub>3</sub>.

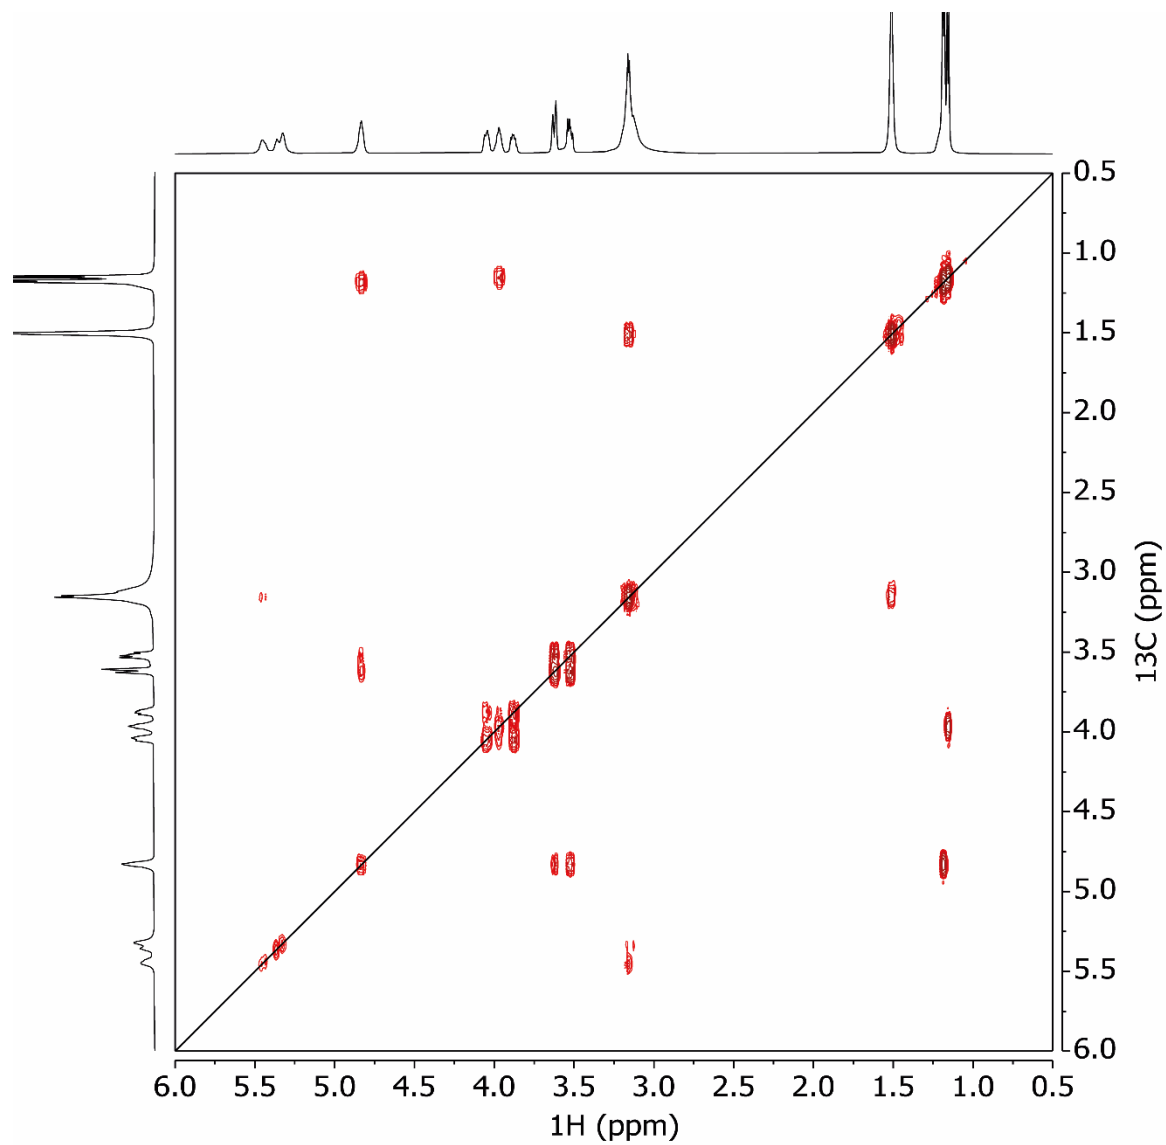

**Figure S3.**  $^1\text{H}$ - $^{13}\text{C}$  COSY (600 MHz,  $\text{CDCl}_3$ ) NMR analysis of the diurethane diols UDOs.

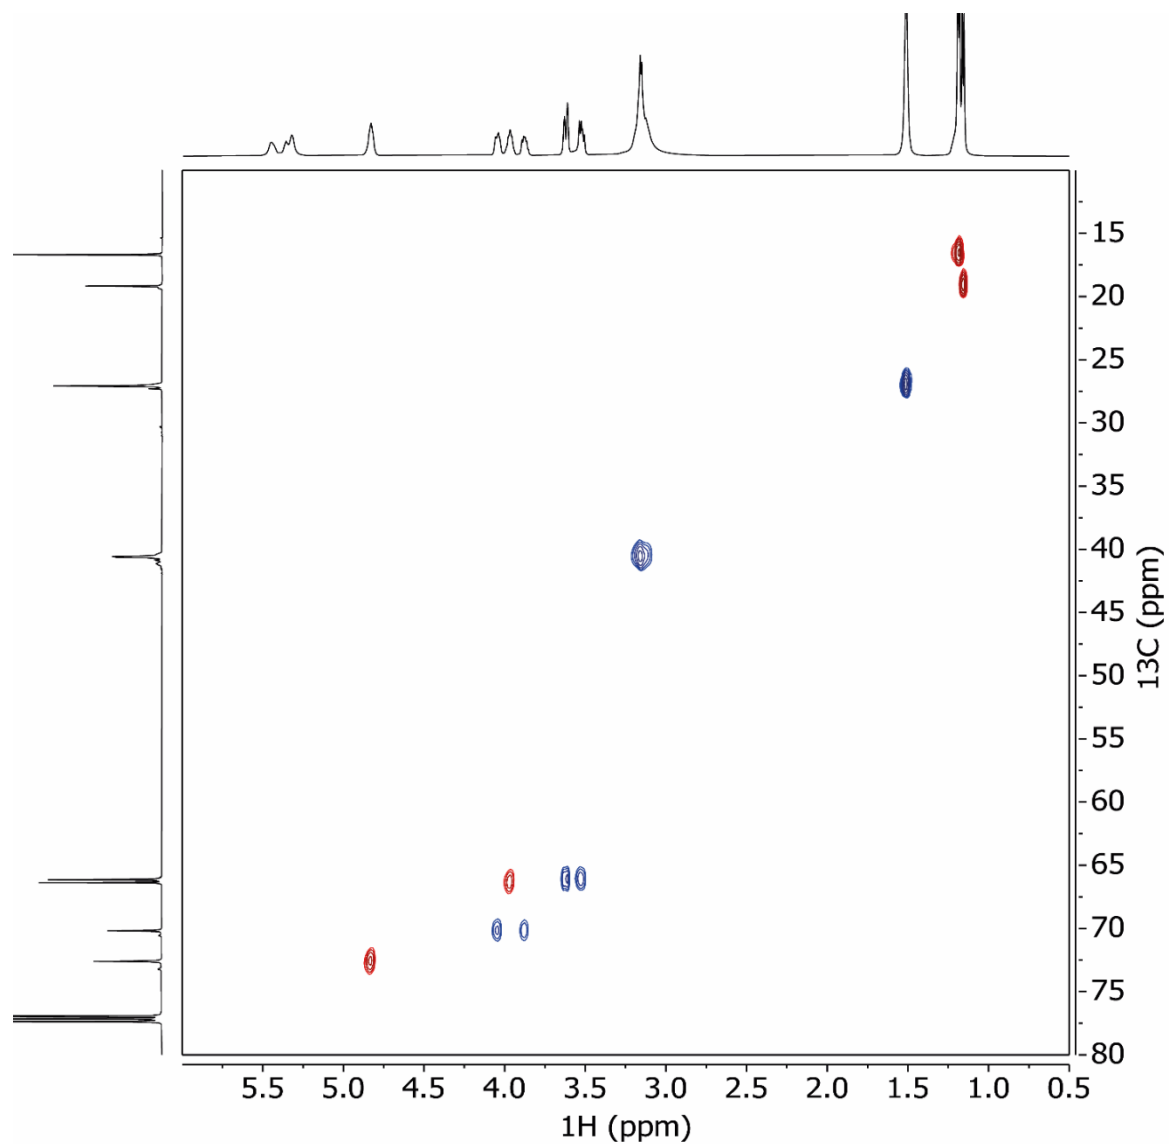

**Figure S4.**  $^1\text{H}$ - $^{13}\text{C}$  HSQC (600 MHz,  $\text{CDCl}_3$ ) NMR analysis of the diurethane diols UDOs. Positive peaks are colored red and are related to CH and  $\text{CH}_3$  groups, while negative peaks are colored blue and are related to  $\text{CH}_2$  groups.

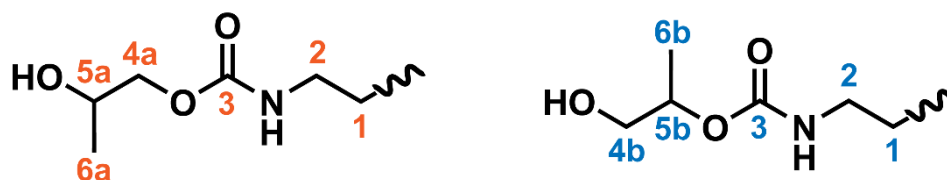

|    | $^1\text{H}$ (ppm) | $^{13}\text{C}$ (ppm) |
|----|--------------------|-----------------------|
| 1  | 1.50               | 27.09                 |
| 2  | 3.16               | 40.64 and 40.57       |
| 3  | -                  | 157.18                |
| 4a | 3.87 and 4.04      | 70.19                 |
| 4b | 3.51 and 3.61      | 66.15                 |
| 5a | 3.97               | 66.38                 |
| 5b | 4.83               | 72.60                 |
| 6a | 1.16               | 19.17                 |
| 6b | 1.18               | 16.69                 |

**Table S1.** NMR spectral attributions for  $\text{UDO}_3$ .

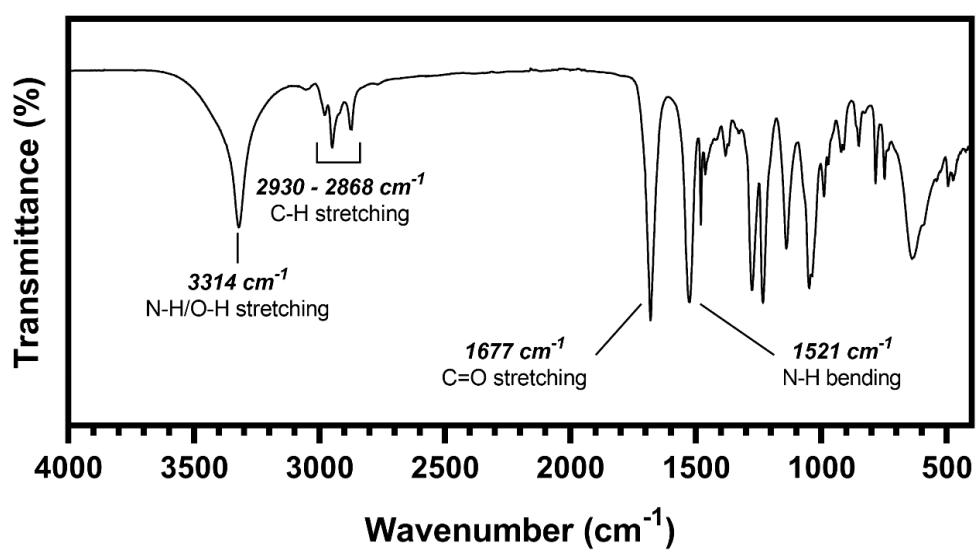

**Figure S5.** ATR-FTIR spectrum of  $\text{UDO}_3$

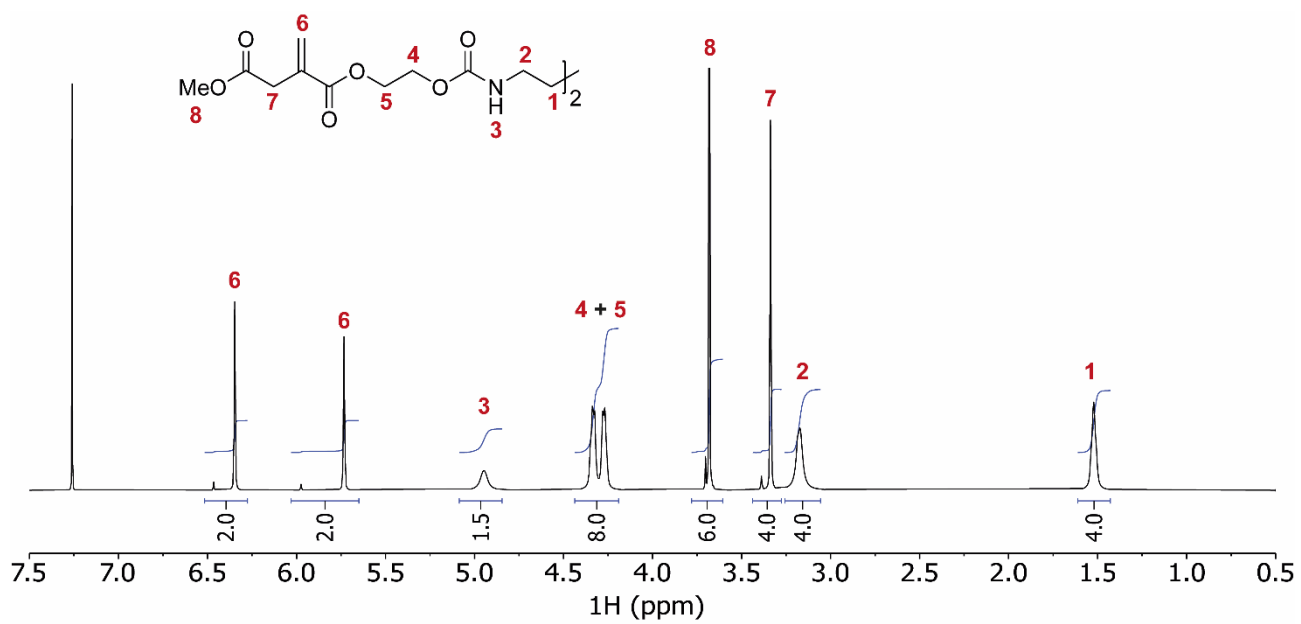

**Figure S6.**  $^1\text{H-NMR}$  (400 MHz,  $\text{CDCl}_3$ ) of  $\text{UDO}_2\text{-I}$

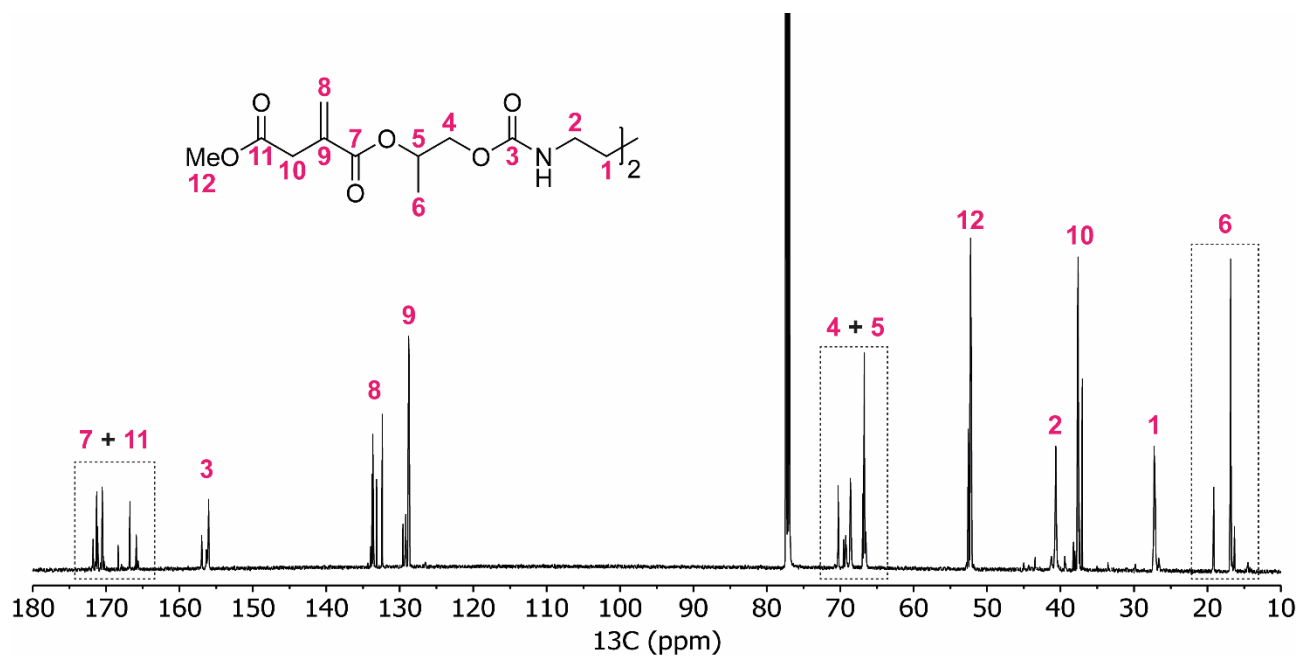

**Figure S7.**  $^{13}\text{C-NMR}$  (150 MHz,  $\text{CDCl}_3$ ) of  $\text{UDO}_3\text{-I}$ .



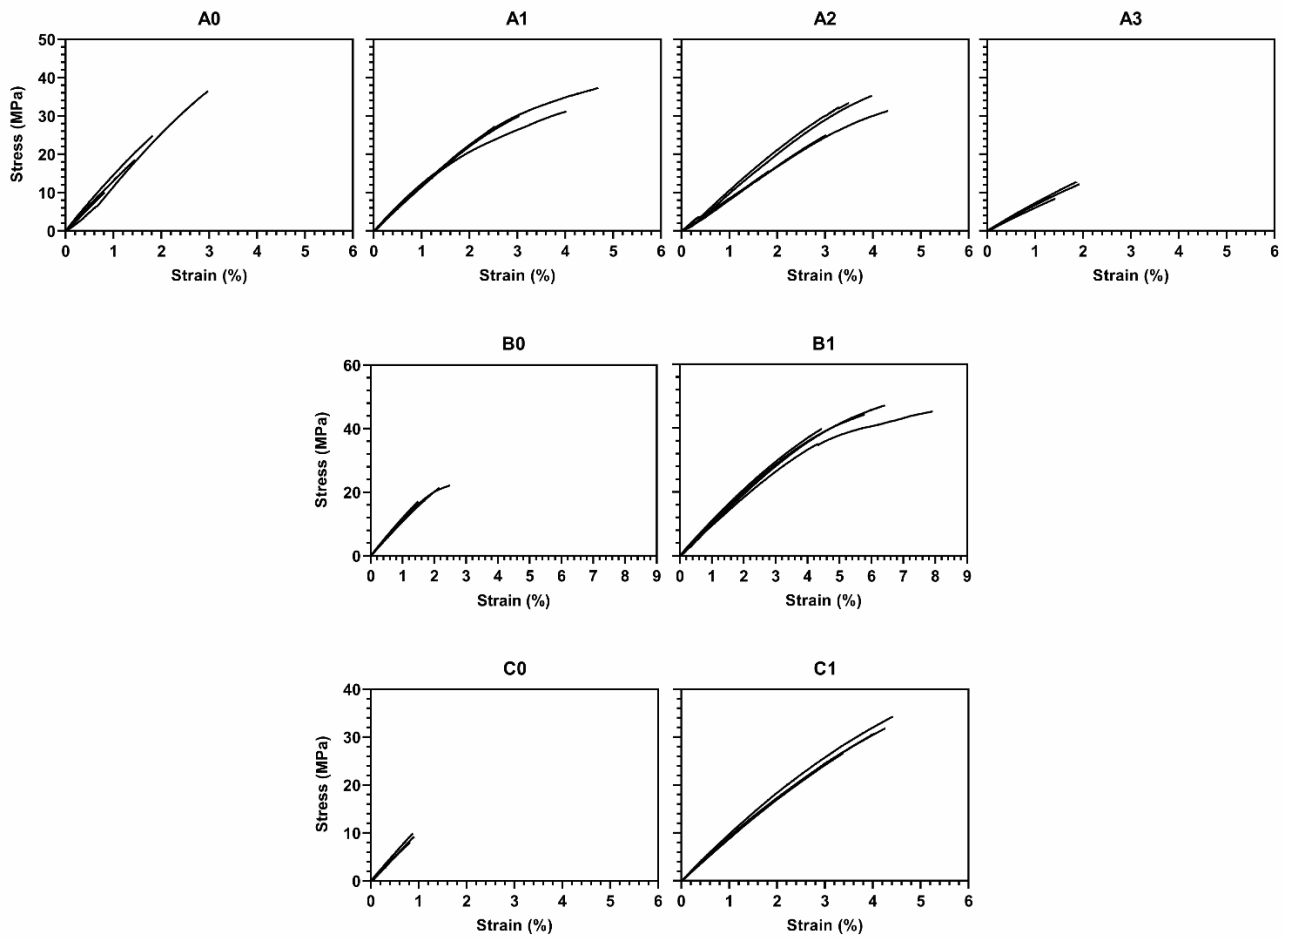

**Figure S8.** Tensile stress-strain curves.

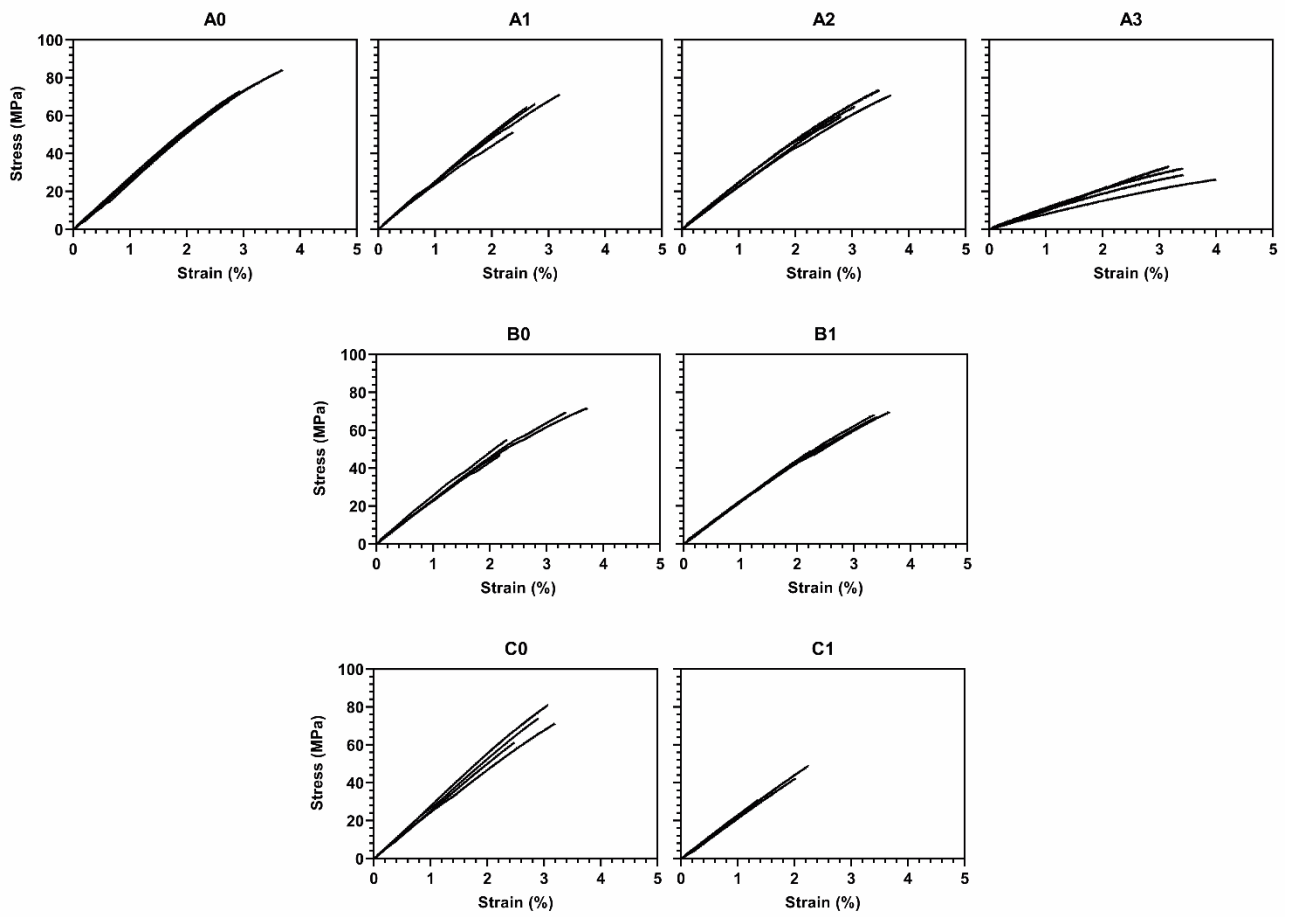

**Figure S9.** Flexural stress-strain curves
